# Supplementary material for: Initiation and Gradual Intensification of Premixed Insulin Lispro Therapy Versus Basal ± Mealtime Insulin in Patients With Type 2 Diabetes Eating Light Breakfasts
Source: Oxford University Press journal article supplement (doi:10.2337/dc12-2704), 2013-10-30

# SUPPLEMENTARY DATA

**Supplementary Table 1.** Number of insulin injections at Week 48 (study end; FAS).

| No. of insulin injections per patient* | Premix (n=137)<br>n (%) | Basal+ (n=130)<br>n (%) |
|----------------------------------------|-------------------------|-------------------------|
| 1 injection                            | 48 (35)                 | 59 (45)                 |
| 2 injections                           | 42 (31)                 | 27 (21)                 |
| 3 injections                           | 43 (31)                 | 30 (23)                 |
| 4 injections                           | 0                       | 14 (11)                 |

\*4 (3%) patients could not be classified.

**Supplementary Table 2.** Insulin regimen at last Visit\* (FAS).

|                         | No of insulin injections n (%)  | Before<br>Breakfast | Before<br>Lunch | Before<br>Dinner |
|-------------------------|---------------------------------|---------------------|-----------------|------------------|
| <b>Premixed insulin</b> | 1 injection (43/13.4%)          |                     |                 | LM25             |
| <b>analogue arm</b>     | 1 injection (18/5.6%)           |                     | LM50            |                  |
|                         | 2 injections (48/15%)           |                     | LM50            | LM25             |
|                         | 3 injections (36/11%)           | LM25                | LM50            | LM25             |
|                         | 3 injections (7/2%)             | LM50                | LM50            | LM25             |
| <b>Basal + insulin</b>  | Glargine QD (80/25%)            |                     |                 |                  |
| <b>lispro arm</b>       | Glargine+ 1Lispro<br>(35/11%)** |                     | X               | X                |
|                         | Glargine+ 2Lispro (31/10%)      |                     | X               | X                |
|                         | Glargine+ 3Lispro (15/5%)       | X                   | X               | X                |

\* 8 (2.5%) patients could not be classified; \*\*midday or evening.

## SUPPLEMENTARY DATA

**Supplementary Figure 1.** Patient flow.

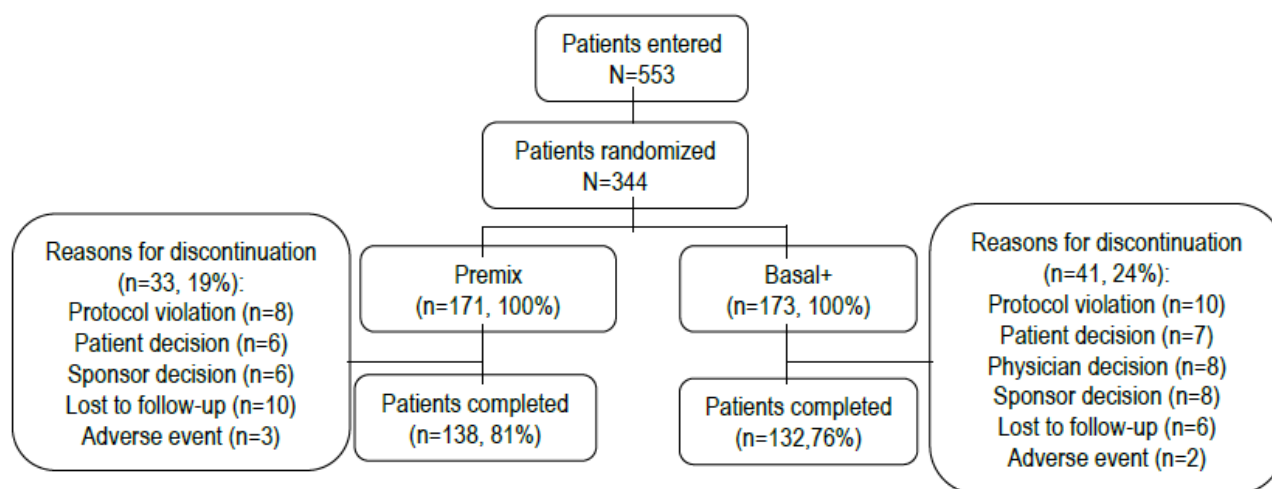

## SUPPLEMENTARY DATA

**Supplementary Figure 2.** HbA<sub>1c</sub> LSmean (SEM) change from baseline at 48 weeks (FAS without LOCF).

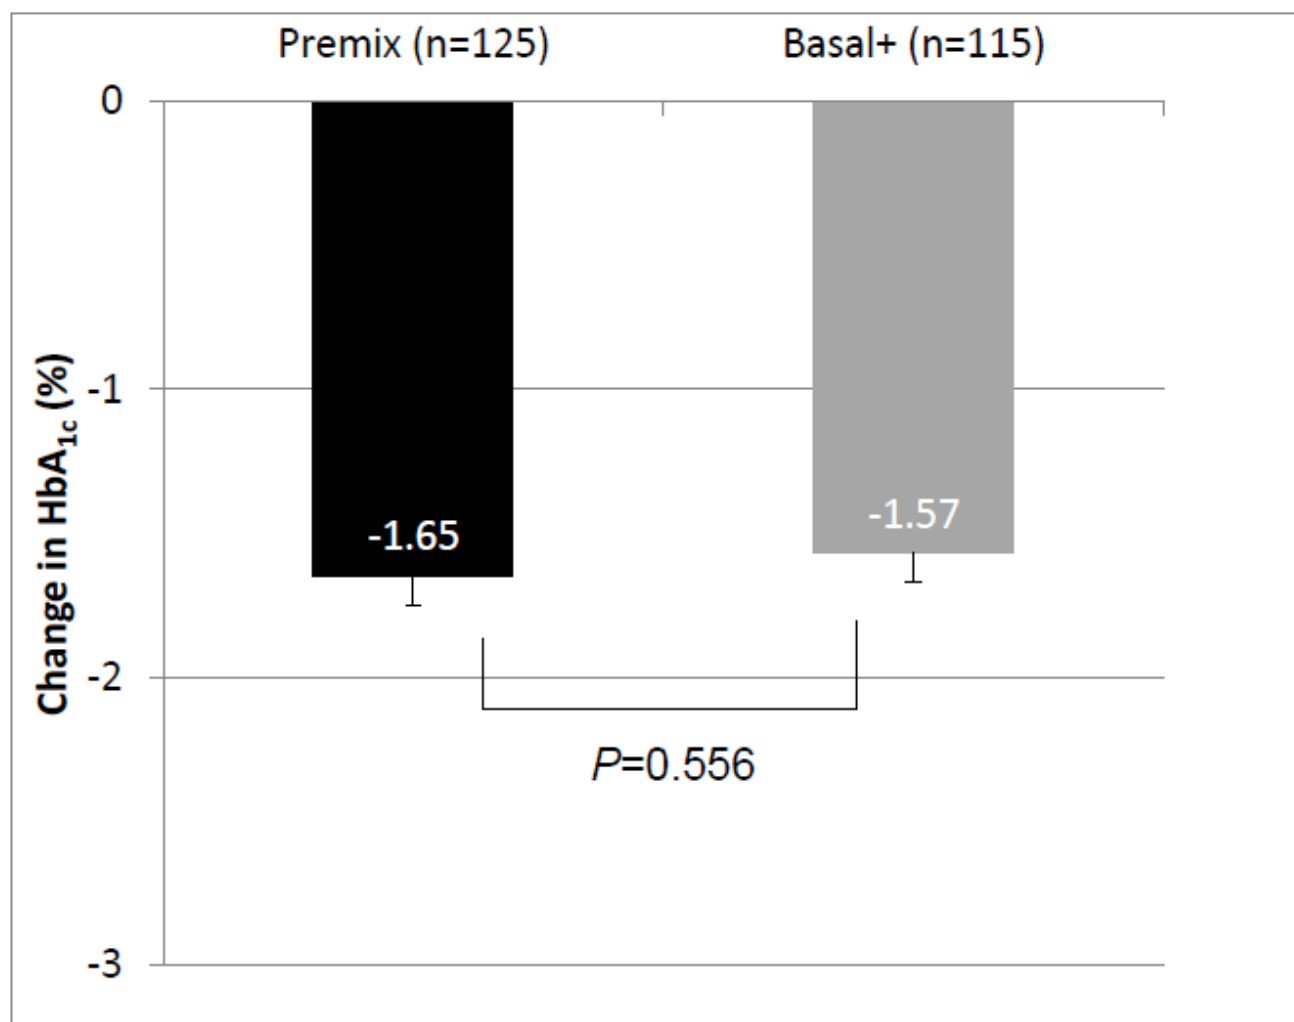

FAS = full analysis set, HbA<sub>1c</sub> = hemoglobin A<sub>1c</sub>, LOCF = last observation carried forward, LSmean = least square mean, SEM = standard error of the mean

## SUPPLEMENTARY DATA

**Supplementary Figure 3.** Time to first hypoglycemia for final Premix treatments and final Basal+ treatments (safety set).

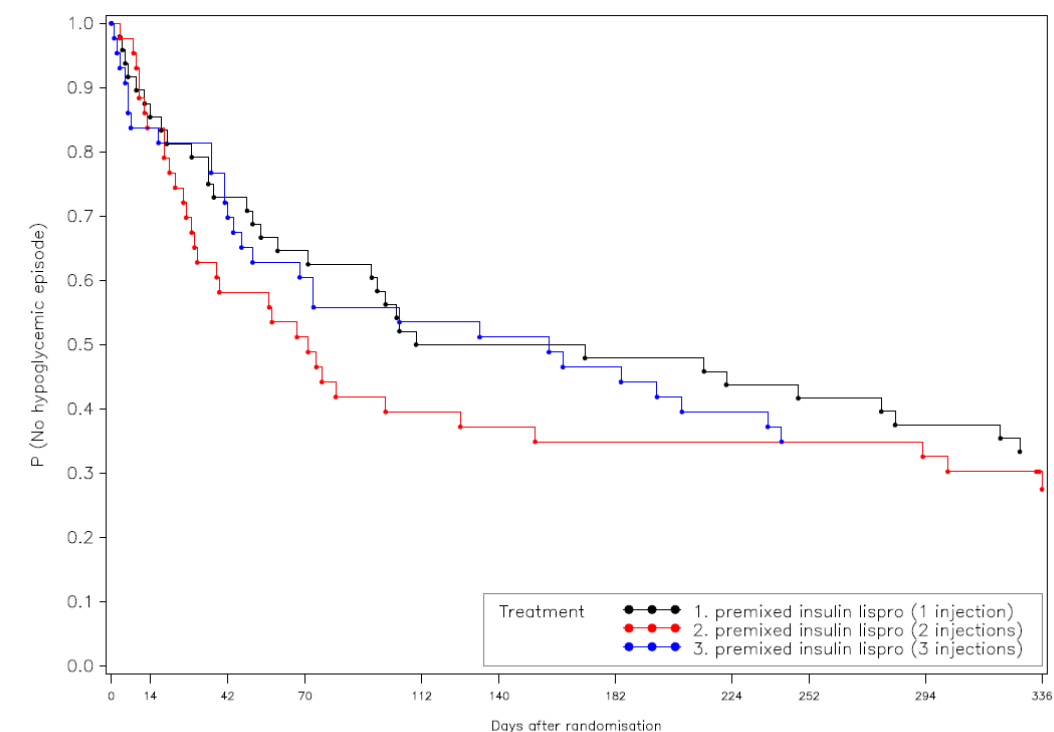

1. premixed insulin lispro (1 injection): LM50 (midday) or LM25 (evening)  
 2. premixed insulin lispro (2 injections): LM50 (midday) and LM25 (evening)  
 3. premixed insulin lispro (3 injections): LM25 (morning), LM50 (midday), LM25 (evening) or LM50 (morning), LM50 (midday), LM25 (evening)

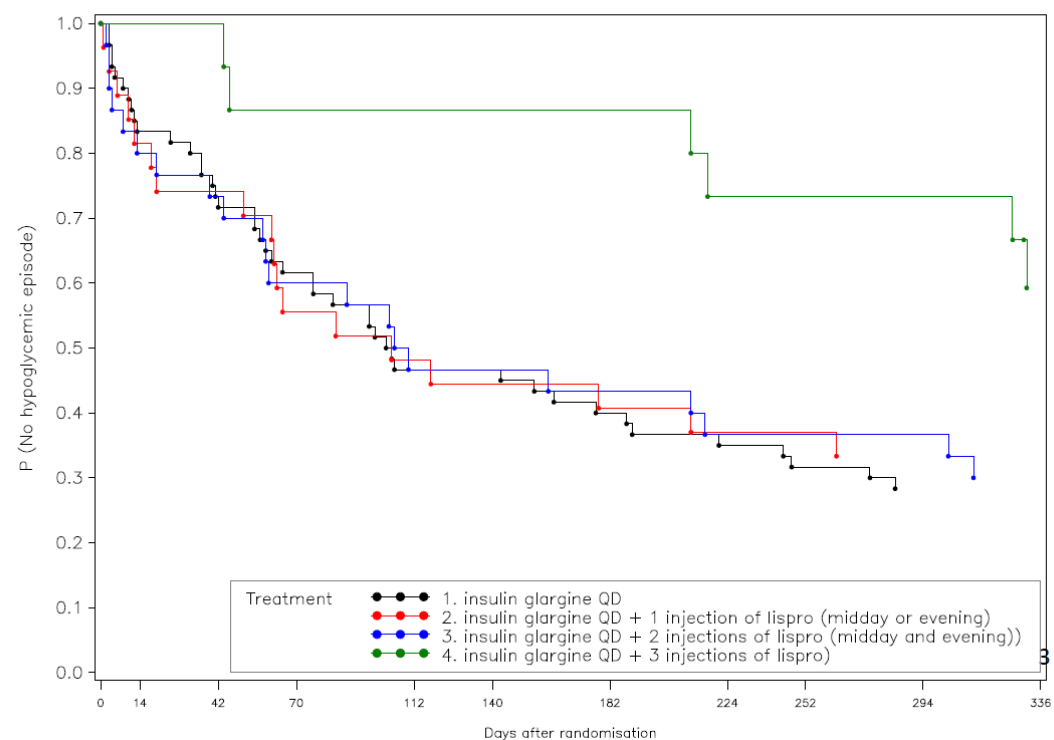

Supplement: dc122704supplementarydata.pdf [file dc122704supplementarydata.pdf]
